# Supplementary material
Source: publisher site journal article supplement (https://static.cambridge.org/content/id/urn:cambridge.org:id:article:S0962728600008873/resource/name/Maschat_et_al,_Appendix_Figure2.pdf)
Supplement: Supplementary file 1 [file Maschat_et_al,_Appendix_Figure2.pdf]

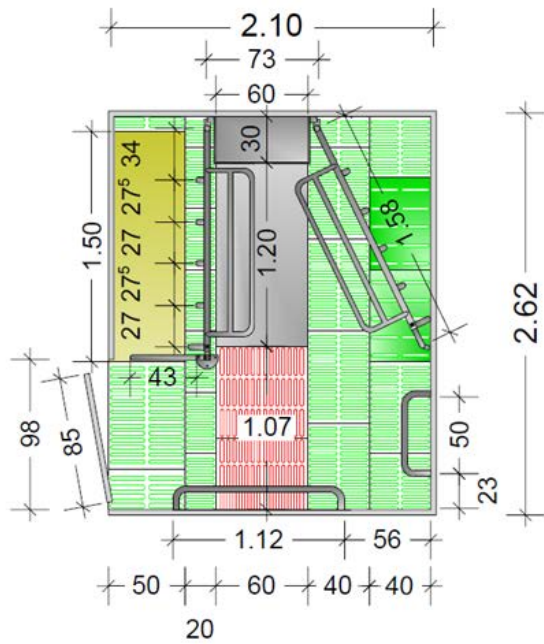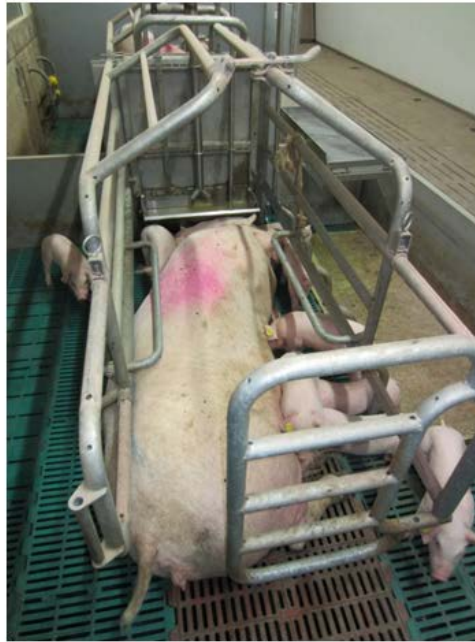

Figure 2: Knick pen (BRÄUER Stalltechnik, Behamberg, Austria): plan of pen with open crate and photograph of sow in closed crate. Both side elements of the crate adjustable in length (telescopic design), one in width. Flexibly pivoted door in the back for closing the crate. Lowest bars (distance to floor: 0.35 m) equipped with vertical pins of half-round, convex shape with tips directing towards the floor. Flooring: solid concrete floor (creep area in beige and area in front of the trough in light grey), cast iron slatted floor (red), plastic slatted floor (light green) and plastic partially slatted floor (dark green). Farrowing rails attached to the rear and one side wall of the pen.
